# Supplementary material for: Metal–organic segment-induced dimensionality evolution in polyoxometalate-based hybrids
Source: Royal Society of Chemistry journal article supplement (doi:10.1039/c3ce42232a), 2014-01-01
Supplement: c3ce42232a1.pdf [file c3ce42232a1.pdf]

## Metal-organic Segments Induced Dimensionality Evolution in Polyoxometalate-based Hybrids (Electronic Supplementary Information)

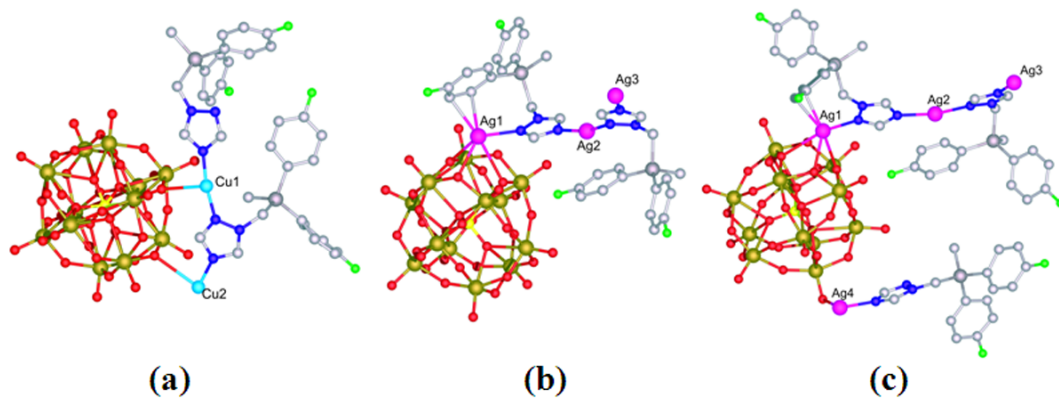

**Figure S1.** Asymmetric units of compounds **1** (a), **2** (b) and **3** (c), respectively.

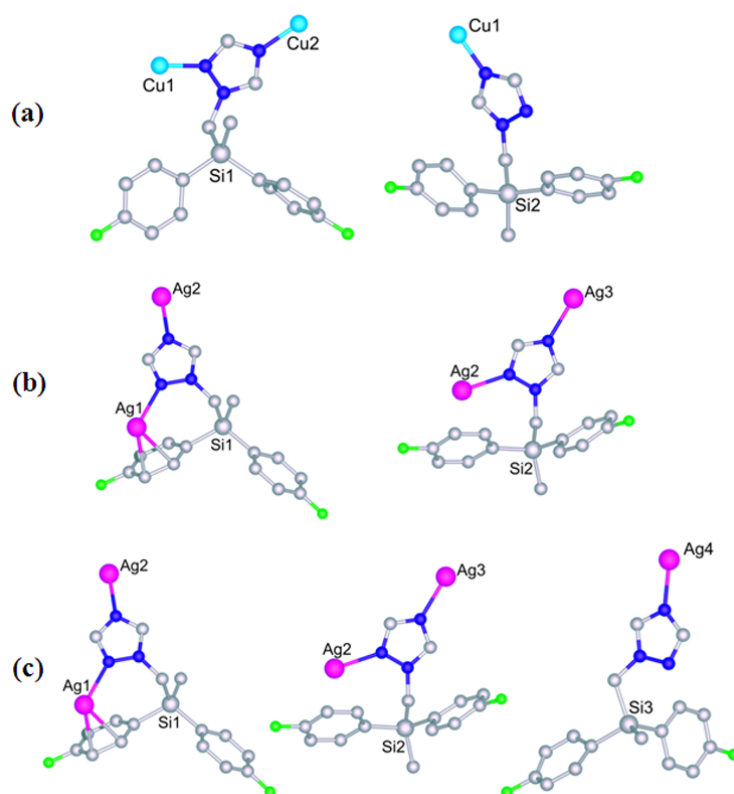

**Figure S2.** Coordination modes of fsa ligands in compounds **1**(a), **2** (b) and **3** (c), respectively.

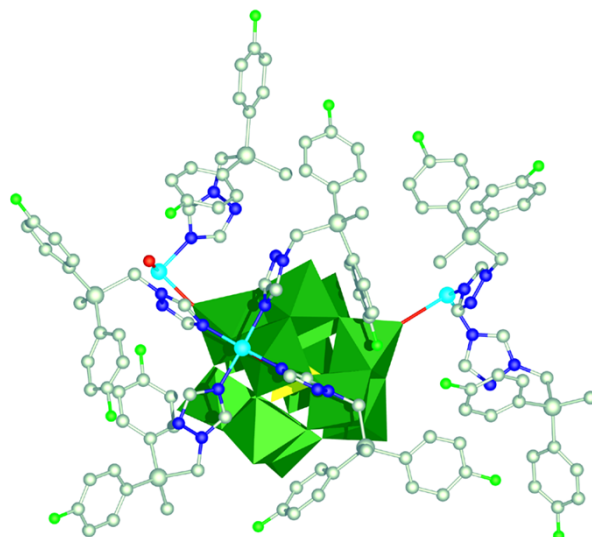

**Figure S3.** Asymmetric unit of compound 4.

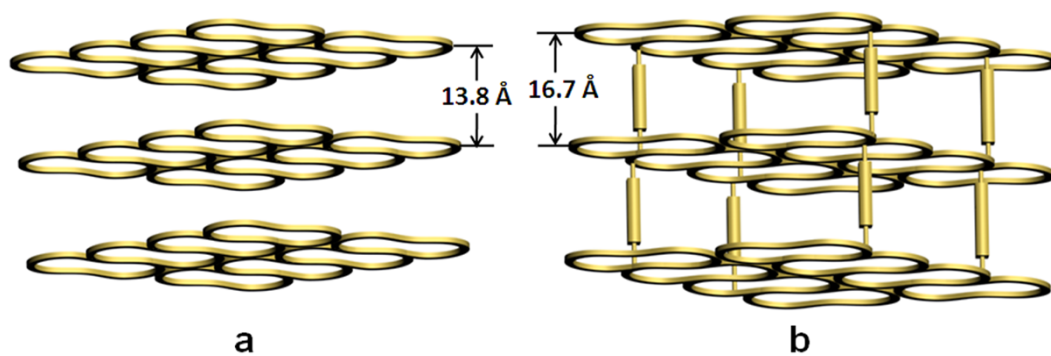

**Figure S4.** Schematic comparison of 3D frameworks between 2 (a) and 3 (b).

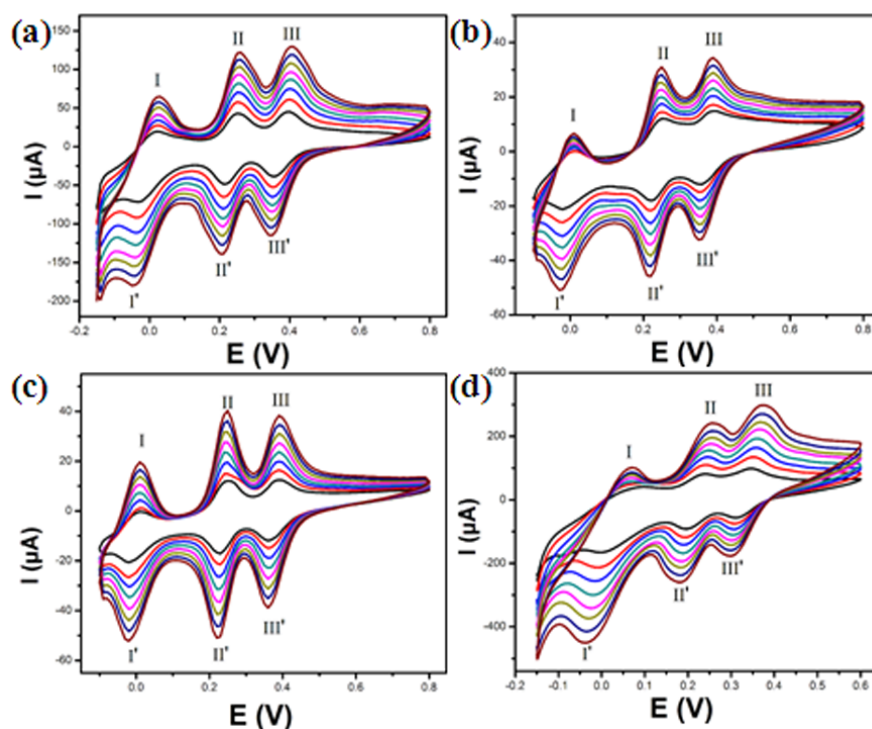

**Figure S5.** CV curves of 1-CPE (a), 2-CPE (b), 3-CPE (c) and 4-CPE (d) in 1 M H<sub>2</sub>SO<sub>4</sub> at different scan rates (from inner to outer: 0.1, 0.15, 0.2, 0.25, 0.3, 0.35, 0.4 and 0.45 V s<sup>-1</sup>).

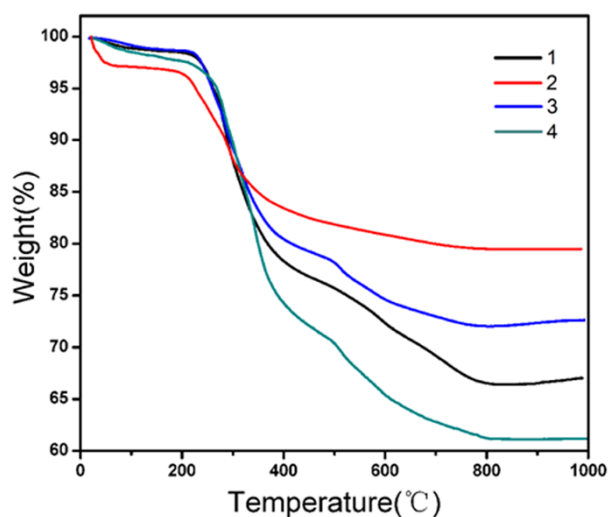

**Figure S6.** TG curves of compounds **1-4**. The TG experiments were performed under N<sub>2</sub> atmosphere with a heating rate of 10 °C min<sup>-1</sup> in the temperature range of 30-1000 °C. In the TG curves, the weight loss of 38.48% (calc. 38.53%) for compound **1**, 23.42% (calc. 23.17%) for **2**, 30.52% (calc. 30.60%) for **3**, and 24.12% (calc. 24.05%) for **4** from 200 to 800 °C correspond to the loss of fsa molecules.

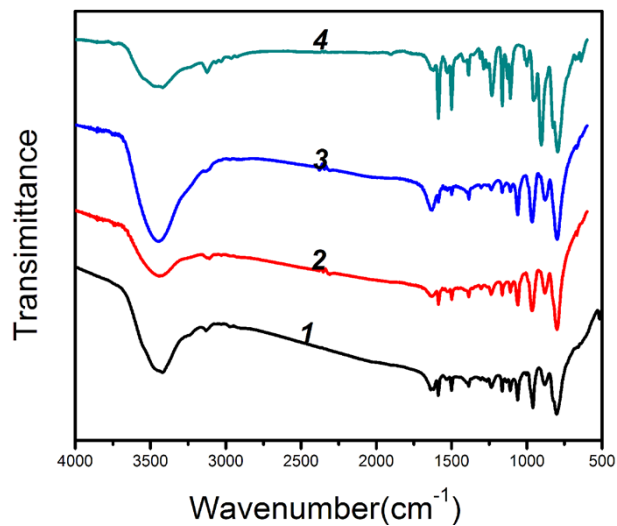

**Figure S7.** IR spectra of compounds **1-4**.

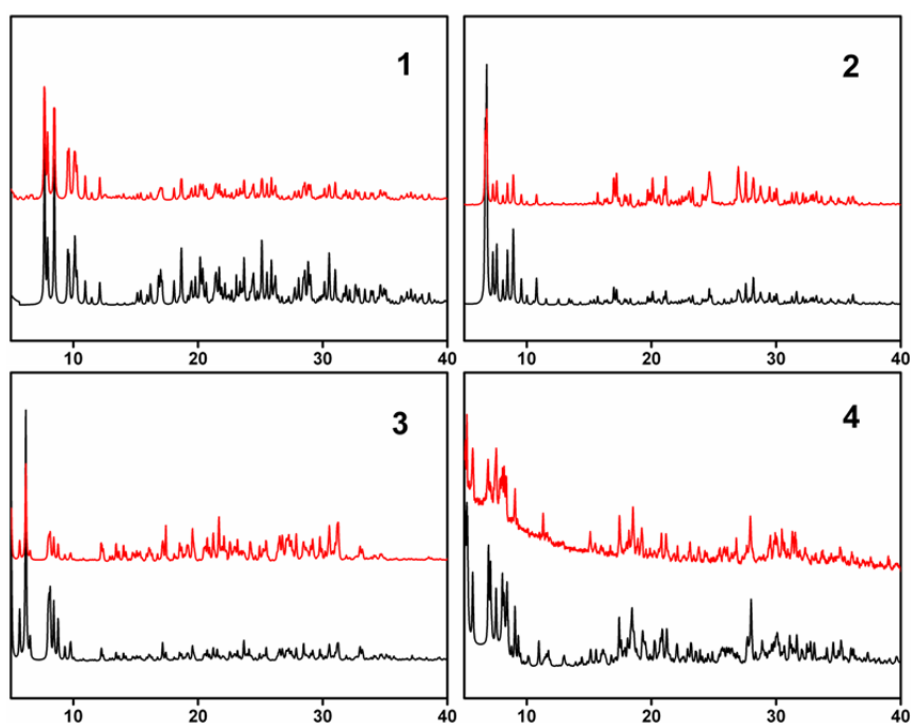

**Figure S8.** Powder XRD patterns for **1-4**: simulated (black) and experimental (red).

**Table S1.** Selected bond distances (Å) and angles (°) for **1-4**.

| <b>1</b>    |          |            |          |
|-------------|----------|------------|----------|
| Cu(1)-N(5)  | 1.874(4) | Cu(1)-N(1) | 1.884(4) |
| Cu(1)-O(11) | 2.668(1) | Cu(2)-N(2) | 1.885(4) |

|                  |            |                   |            |
|------------------|------------|-------------------|------------|
| Cu(2)-N(2)#2     | 1.885(4)   |                   |            |
| N(5)-Cu(1)-N(1)  | 170.72(19) | N(2)-Cu(2)-N(2)#2 | 180.00(17) |
| O(11)-Cu(1)-N(5) | 96.501(17) | O(11)-Cu(1)-N(1)  | 90.325(15) |

---

## 2

---

|                   |           |                   |            |
|-------------------|-----------|-------------------|------------|
| Ag(1)-N(1)        | 2.275(9)  | Ag(1)-O(12)       | 2.397(9)   |
| Ag(1)-C(5)        | 2.472(15) | Ag(1)-C(6)        | 2.497(13)  |
| Ag(2)-N(2)        | 2.143(10) | Ag(2)-N(4)        | 2.147(11)  |
| Ag(3)-N(5)        | 2.125(18) | Ag(3)-N(5)#1      | 2.132 (18) |
| N(1)-Ag(1)-O12(1) | 123.2(3)  | N(1)-Ag(1)-C(5)   | 100.6(4)   |
| O(12)-Ag(1)-C(5)  | 132.3(4)  | N(1)-Ag(1)-C(6)   | 126.1(4)   |
| O(12)-Ag(1)-C(6)  | 110.7(4)  | C(5)-Ag(1)-C(6)   | 31.5(4)    |
| N(2)-Ag(2)-N(4)   | 162.1(5)  | N(5)-Ag(3)-N(5)#1 | 165.2(4)   |

---

## 3

---

|                   |            |                   |            |
|-------------------|------------|-------------------|------------|
| Ag(1)-N(1)        | 2.287(4)   | Ag(1)-O(18)       | 2.418(4)   |
| Ag(1)-C(8)        | 2.572(6)   | Ag(1)-C(9)        | 2.595(6)   |
| Ag(2)-N(2)        | 2.146(4)   | Ag(2)-N(4)        | 2.168(4)   |
| Ag(3)-N(5)        | 2.138(4)   | Ag(3)-N(5)#1      | 2.138(4)   |
| Ag(4)-N(8)#2      | 2.118(5)   | Ag(4)-N(8)        | 2.118(5)   |
| O(18)-Ag(1)-C(8)  | 117.39(16) | O(18)-Ag(1)-C(9)  | 142.13(16) |
| N(1)-Ag(1)-O(18)  | 122.25(14) | N(1)-Ag(1)-C(8)   | 119.35(18) |
| N(1)-Ag(1)-C(9)   | 94.66(17)  | C(8)-Ag(1)-C(9)   | 31.48(19)  |
| N(2)-Ag(2)-N(4)   | 164.35(18) | N(5)-Ag(3)-N(5)#1 | 180.0(3)   |
| N(8)-Ag(4)-N(8)#2 | 180.00(19) |                   |            |

---

## 4

---

|             |           |               |           |
|-------------|-----------|---------------|-----------|
| Cu(1)-N(4)  | 2.016(11) | Cu(1)-N(7)    | 2.012(12) |
| Cu(1)-N(1)  | 2.023(11) | Cu(1)-N(10)   | 2.033(12) |
| Cu(1)-O(24) | 2.306(8)  | Cu(2)-N(13)#1 | 1.980(13) |
| Cu(2)-N(13) | 1.980(13) | Cu(2)-N(16)#1 | 2.054(12) |
| Cu(2)-N(16) | 2.054(12) | Cu(2)-O(33)   | 2.404(9)  |

|                       |           |                       |            |
|-----------------------|-----------|-----------------------|------------|
| Cu(2)-O(33)#1         | 2.404(9)  | Cu(3)-N(19)#2         | 1.969(12)  |
| Cu(3)-N(19)           | 1.969(12) | Cu(3)-O(11)#2         | 2.003(9)   |
| Cu(3)-O(11)           | 2.003(9)  | Cu(3)-O(1W)           | 2.387(10)  |
| Cu(3)-O(1W)#2         | 2.387(10) |                       |            |
| N(4)-Cu(1)-N(7)       | 91.9(5)   | N(4)-Cu(1)-N(1)       | 175.4(4)   |
| N(7)-Cu(1)-N(1)       | 90.0(5)   | N(4)-Cu(1)-N(10)      | 90.4(5)    |
| N(7)-Cu(1)-N(10)      | 177.6(5)  | N(1)-Cu(1)-N(10)      | 87.6(5)    |
| N(4)-Cu(1)-O(24)      | 87.3(4)   | N(7)-Cu(1)-O(24)      | 90.5(4)    |
| N(1)-Cu(1)-O(24)      | 96.9(4)   | N(10)-Cu(1)-O(24)     | 90.3(4)    |
| N(13)#1-Cu(2)-N(13)   | 180.0(6)  | N(13)#1-Cu(2)-N(16)#1 | 88.2(5)    |
| N(13)-Cu(2)-N(16)#1   | 91.8(5)   | N(13)#1-Cu(2)-N(16)   | 91.8(5)    |
| N(13)-Cu(2)-N(16)     | 88.2(5)   | N(16)#1-Cu(2)-N(16)   | 180.0(6)   |
| N(13)#1-Cu(2)-O(33)   | 87.8(4)   | N(13)-Cu(2)-O(33)     | 92.2(4)    |
| N(16)#1-Cu(2)-O(33)   | 95.1(4)   | N(16)-Cu(2)-O(33)     | 84.9(4)    |
| N(13)#1-Cu(2)-O(33)#1 | 92.2(4)   | N(13)-Cu(2)-O(33)#1   | 87.8(4)    |
| N(16)#1-Cu(2)-O(33)#1 | 84.9(4)   | N(16)-Cu(2)-O(33)#1   | 95.1(4)    |
| O(33)-Cu(2)-O(33)#1   | 180.0(5)  | N(19)#2-Cu(3)-N(19)   | 180.000(2) |
| N(19)#2-Cu(3)-O(11)#2 | 91.4(4)   | N(19)-Cu(3)-O(11)#2   | 88.6(4)    |
| N(19)#2-Cu(3)-O(11)   | 88.6(4)   | N(19)-Cu(3)-O(11)     | 91.4(4)    |
| O(11)#2-Cu(3)-O(11)   | 180.0(5)  | N(19)#2-Cu(3)-O(1W)   | 89.0(4)    |
| N(19)-Cu(3)-O(1W)     | 91.0(4)   | O(11)#2-Cu(3)-O(1W)   | 89.2(4)    |
| O(11)-Cu(3)-O(1W)     | 90.8(4)   | N(19)#2-Cu(3)-O(1W)#2 | 91.0(4)    |
| N(19)-Cu(3)-O(1W)#2   | 89.0(4)   | O(11)#2-Cu(3)-O(1W)#2 | 90.8(4)    |
| O(11)-Cu(3)-O(1W)#2   | 89.2(4)   | O(1W)-Cu(3)-O(1W)#2   | 180.000(2) |

Symmetry code: for 1: #1 -x+1, -y+1, -z; #2 -x, -y+2, -z; for 2: #1 -x+1, -y, -z; #2 -x, -y, -z; for 3:

#1 1-x, -y, 1-z; #2 1-x, 2-y, -z; for 4: #1 -x, -y+1, -z+1; #2 -x+1, -y+1, -z+1.
